# Supplementary material for: Terrestrial carbon cycle: tipping edge of climate change between the atmosphere and biosphere ecosystems
Source: Royal Society of Chemistry journal article supplement (doi:10.1039/d1ea00102g), 2022-01-01

## SUPPLEMENT DOCUMENT

### Terrestrial carbon cycle: A tipping edge of climate change between atmosphere and biosphere ecosystems

Manoj Hari  and Bishma Tyagi \*

#### Acronyms

|                 |                                                 |            |                                                         |
|-----------------|-------------------------------------------------|------------|---------------------------------------------------------|
| AGC             | Above Ground Carbon                             | Mha        | Million hectares                                        |
| ALOS - 4        | Advanced Land Observing Satellite - 4           | MODIS      | MODerate resolution Imaging Spectroradiometer           |
| APAR            | Absorbed Photosynthetically Active Radiation    | MOLI       | Multi-footprint Observation Lidar and Imager            |
| ATLAS           | Advanced Topographic Laser Altimeter System     | N          | Nitrogen                                                |
| AVHRR           | Advanced Very High-Resolution Radiometer        | NBE        | Net Biome Production                                    |
| BGC             | Below Ground carbon                             | NDVI       | Normalized Difference Vegetation Index                  |
| C               | Carbon                                          | NEE        | Net Ecosystem Exchange                                  |
| CH <sub>4</sub> | Methane                                         | NEP        | Net Ecosystem Production                                |
| CO <sub>2</sub> | Carbon dioxide                                  | NISAR      | NASA - ISRO Synthetic Aperture Radar                    |
| DBC             | Dead Biomass Component                          | NPP        | Net Primary Production                                  |
| DBH             | Diameter at Breast Height                       | Nr         | reactive N                                              |
| DGVM            | Dynamic Global Vegetation Model                 | OLS        | Ordinary Least Square                                   |
| DOM             | Dead Organic matter                             | PAR        | Photosynthetically Active Radiation                     |
| DVI             | Difference Vegetation Index                     | PFTs       | Plant Functioning Types                                 |
| Eh              | Redox potential                                 | Pg C       | Petagram of Carbon                                      |
| ER              | Ecosystem Respiration                           | ppm        | parts per million                                       |
| ET              | EvapoTranspiration                              | Ra         | Autotrophic Respiration                                 |
| FOTO            | Fourier Transform Textural Ordination           | Raa        | Aboveground Autotrophic Respiration                     |
| fPAR            | Fraction of Photosynthetically Active Radiation | Rab        | Belowground Autotrophic Respiration                     |
| GEDI            | Global Ecosystem Dynamics Investigation         | RADAR      | RADio Detection And Ranging                             |
| GLCM            | Grey Level Co-occurrence Matrix                 | RAR        | Real Aperture Radar                                     |
| GLO - PEM       | GLObal Production Efficiency Model              | Rh         | Heterotrophic Respiration                               |
| GPP             | Gross Primary Production                        | RS         | Remote Sensing                                          |
| Gt C            | Gigaton of Carbon                               | SAOCOM     | Satélite Argentino de Observación CON Microondas        |
| GWR             | Geographically Weighted Regression              | SAR        | Synthetic Aperture Radar                                |
| ISAM            | Integrated Science Assessment Model             | SIF        | Solar-Induced chlorophyll Fluorescence                  |
| LAI             | Leaf Area Index                                 | SMLR       | Stepwise Multiple Linear Regression                     |
| LiDAR           | Light Detection And Ranging                     | SOC        | Soil Organic Carbon                                     |
| LST             | Land Surface Temperature                        | TanDEM - X | TerraSAR - X Add - oN for Digital Elevation Measurement |
| LUC             | Land Use Conversions                            | TBM        | Terrestrial Biosphere Model                             |
| LUE             | Light Use Efficiency model                      | VIs        | Vegetation Indices                                      |

Department of Earth and Atmospheric Sciences,  
National Institute of Technology Rourkela, India.  
E-mail: tyagib@nitrkl.ac.in

## Fig. S1

Spatial distribution of global flux measurement networks and their availability (red dots), superimposed over GPP for the year 2020, produced from MODIS, <https://lpdaac.usgs.gov/products/mod17a2hv006/>. The length of the flux network data record is further presented on continental scale. Green section indicates data record for 2+ years, grey section is for 5+ years, blue section is for 10+ years and red section represents data record for 15+ years.

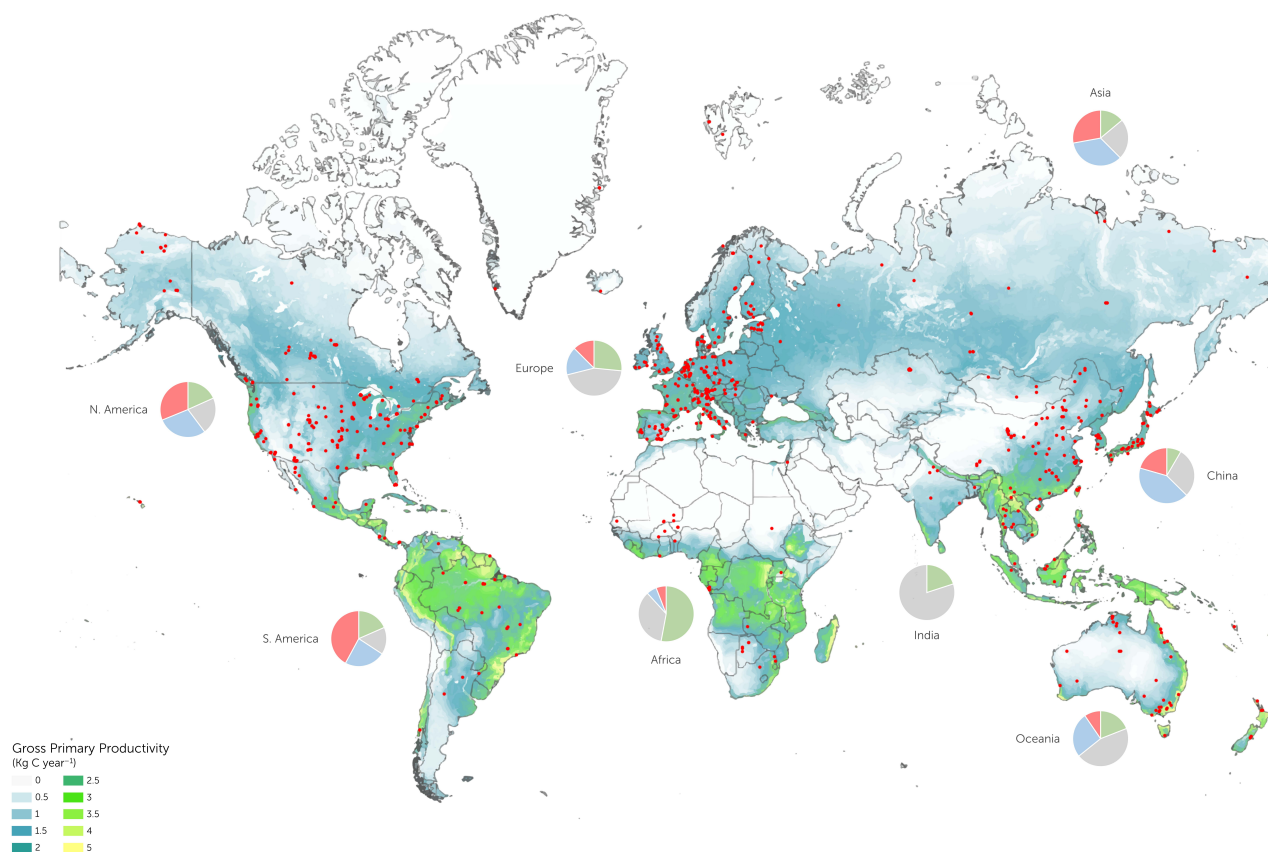

Supplement: d1ea00102g1.pdf [file d1ea00102g1.pdf]
